# Supplementary material for: Detection of Eight Cannabinoids and One Tracer in Wastewater and River Water by SPE-UPLC–ESI-MS/MS
Source: MDPI journal article supplement (doi:10.3390/w14040588), 2022-02-15
Supplement: s1 [file s1]

## Detection of eight cannabinoids and one tracer in wastewater and river water by SPE-UPLC–ESI-MS/MS.

Simone Milan <sup>1</sup>, Filomena Lelario <sup>1,\*</sup>, Laura Scrano <sup>2,\*</sup>, Chiara Ottati <sup>3</sup>, Sabino Aurelio Bufo <sup>1,4</sup>, and Maria de Fátima Alpendurada <sup>5</sup>

<sup>1</sup> Department of Sciences, University of Basilicata, 85100 Potenza, Italy; [filomena.lelario@unibas.it](mailto:filomena.lelario@unibas.it) (FL); [sabino.bufo@unibas.it](mailto:sabino.bufo@unibas.it) (SAB).

<sup>2</sup> Department of European Cultures (DICEM), University of Basilicata, 75100 Matera, Italy; [laura.scrano@unibas.it](mailto:laura.scrano@unibas.it) (LS).

<sup>3</sup> TabConsulting S.r.l.s, 85100 Potenza, Italy; [c.ottati@tabconsulting.eu](mailto:c.ottati@tabconsulting.eu) (CO).

<sup>4</sup> Department of Geography, Environmental Management & Energy Studies, University of Johannesburg, 2092 Johannesburg, South Africa.

<sup>5</sup> IAREN - Instituto da Água da Região Norte, 4450-113 Porto, Portugal; [mfalpendurada@iaren.pt](mailto:mfalpendurada@iaren.pt) (MFA).

\* Correspondence: [filomena.lelario@unibas.it](mailto:filomena.lelario@unibas.it); [laura.scrano@unibas.it](mailto:laura.scrano@unibas.it).

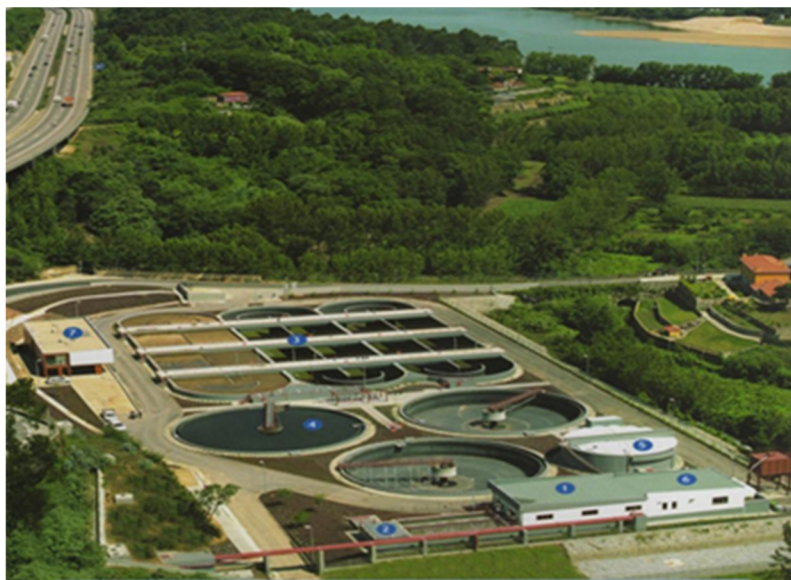

**Figure S1.** Aerial view of the WWTP located in Vila Nova de Gaia, Porto (Photo courtesy of Águas de Gaia).

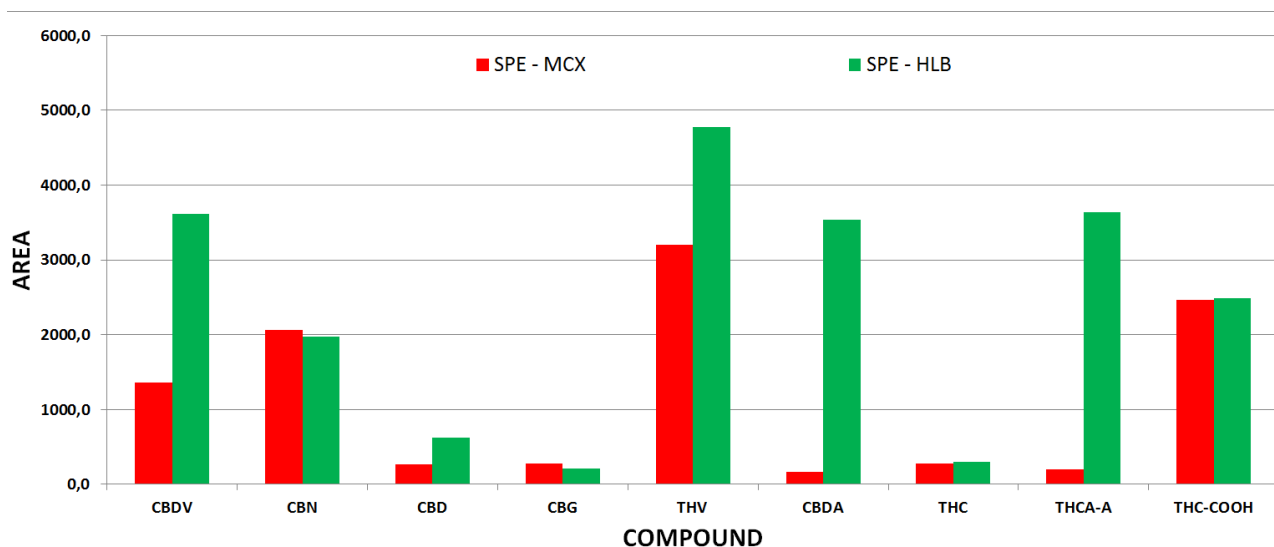

**Figure S2.** Comparison of solid-phase MCX (6 mL) and HLB (6 mL) sorbent types needed for the cartridge optimization.

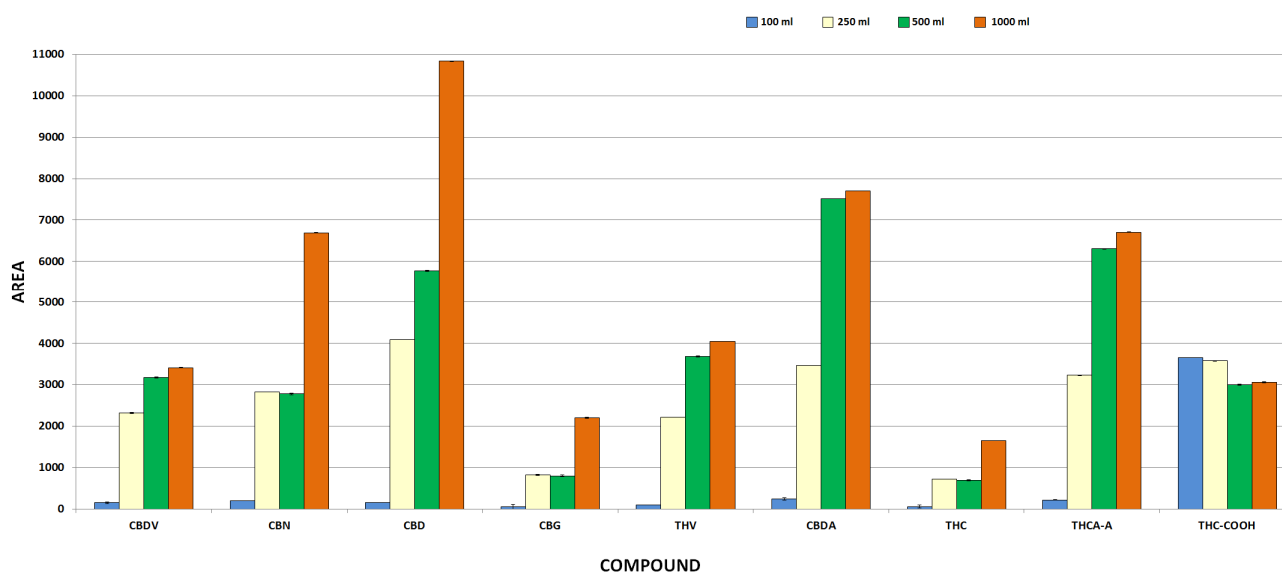

**Figure S3.** Breakthrough volume defining the optimal volume of environmental water sample to pre-concentrate/enrich via the developed offline SPE method using HLB cartridges (6 mL).

**Table S1.** Optimized SPE-UPLC-MS/MS parameters: working range, determination coefficient ( $R^2$ ), molecular mass (MM), ionization mode (ESI), limit of quantification (LOQ), limit of detection (LOD), intermediate precision (IP) and repeatability (REP).

| Compound | Range<br>( $\mu\text{g L}^{-1}$ ) | $R^2$  | MM     | ESI | LOQ<br>(S/N=10) | LOD<br>(S/N=3) | IP<br>(RSD%) | REP<br>(%) |
|----------|-----------------------------------|--------|--------|-----|-----------------|----------------|--------------|------------|
| CBDV     | 0.050-0.500                       | 0.9995 | 286.41 | -p  | 0.046           | 0.015          | 6.1          | 6.8        |
| CBN      | 0.050-0.500                       | 0.9953 | 310.43 | -p  | 0.147           | 0.048          | 10.0         | 5.3        |
| CBD      | 0.050-0.500                       | 0.9991 | 314.45 | +p  | 0.065           | 0.021          | 2.6          | 8.8        |
| CBG      | 0.050-0.500                       | 0.9995 | 316.48 | +p  | 0.047           | 0.016          | 8.0          | 24.8       |
| THV      | 0.050-0.500                       | 0.9990 | 286.41 | -p  | 0.070           | 0.023          | 8.2          | 7.2        |
| CBDA     | 0.050-0.500                       | 0.9986 | 358.47 | +p  | 0.080           | 0.026          | 5.9          | 17.1       |
| THC      | 0.050-0.500                       | 0.9991 | 314.45 | +p  | 0.063           | 0.021          | 5.8          | 21.8       |
| THCA-A   | 0.050-0.500                       | 0.9980 | 358.47 | -p  | 0.098           | 0.032          | 4.9          | 11.2       |
| THC-COOH | 0.050-0.150                       | 0.9987 | 344.45 | +p  | 0.019           | 0.006          | 3.8          | 13.8       |

**Table S2.** Summary of the standard solutions considered and electrospray ionization optimization (grey) through IntelliStart™ (CE = Collision energy; CV =Cone voltage).

| Compound name                       | Standard solution |       | Molecular formula                              | MM       | Abbreviation | Structural formula                                                                    | ESI POSITIVE                      |                                   |                                   | ESI NEGATIVE                      |                                   |                                   |
|-------------------------------------|-------------------|-------|------------------------------------------------|----------|--------------|---------------------------------------------------------------------------------------|-----------------------------------|-----------------------------------|-----------------------------------|-----------------------------------|-----------------------------------|-----------------------------------|
|                                     | Conc.             | Unit  |                                                |          |              |                                                                                       | 1 <sup>a</sup>                    | 2 <sup>a</sup>                    | 3 <sup>a</sup>                    | 1 <sup>a</sup>                    | 2 <sup>a</sup>                    | 3 <sup>a</sup>                    |
| (-)-delta-9-Tetrahydrocannabinol-C3 | 1000              | µg/mL | C <sub>19</sub> H <sub>26</sub> O <sub>2</sub> | 286.41   | THCV or THV  | 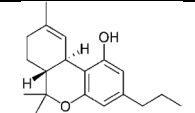   | 287.16(CV42)<br>>165.05<br>(CE22) | 287.16(CV42)<br>>93.05<br>(CE22)  | 287.16(CV42)<br>>135.17<br>(CE14) | 285.16(CV60)<br>>217.12<br>(CE26) | 285.16(CV60)<br>>163.17<br>(CE26) | 285.16(CV60)<br>>151.00<br>(CE20) |
| Cannabigerol                        | 1000              | µg/mL | C <sub>21</sub> H <sub>32</sub> O <sub>2</sub> | 316.48   | CBG          |    | 317.21(CV22)<br>>193.13<br>(CE22) | 317.21(CV22)<br>>123.05<br>(CE34) | 317.21(CV22)<br>>76.96<br>(CE22)  | 315.21(CV48)<br>>136.01<br>(CE26) | 315.21(CV48)<br>>191.37<br>(CE24) | 315.21(CV48)<br>>177.13<br>(CE24) |
| Cannabidiol                         | 1000              | µg/mL | C <sub>21</sub> H <sub>30</sub> O <sub>2</sub> | 314.45   | CBD          |    | 315.13(CV12)<br>>168.99<br>(CE6)  | 315.13(CV12)<br>>183.05<br>(CE6)  | 315.13(CV12)<br>>283.11<br>(CE12) | 313.19(68CV)<br>>245.12<br>(CE26) | 313.19(68CV)<br>>191.12<br>(CE26) | 313.19(68CV)<br>>179.02<br>(CE22) |
| Tetrahydrocannabinolic acid         | 1                 | µg/mL | C <sub>22</sub> H <sub>30</sub> O <sub>4</sub> | 358.4733 | THCA-A       |    | -                                 | -                                 | -                                 | 357.18(CV48)<br>>245.15<br>(CE32) | 357.18(CV48)<br>>191.14<br>(CE32) | 357.18(CV48)<br>>179.04<br>(CE28) |
| Cannabidiolic Acid                  | 1                 | µg/mL | C <sub>22</sub> H <sub>30</sub> O <sub>4</sub> | 358.47   | CBDA         |    | 359.12(CV14)<br>>196.54<br>(CE18) | 359.12(CV14)<br>>213.13<br>(CE8)  | 359.12(CV14)<br>>227.77<br>(CE10) | 357.18(54CV)<br>>245.16<br>(CE34) | 357.18(54CV)<br>>191.14<br>(CE34) | 357.18(54CV)<br>>107.05<br>(CE46) |
| Tetrahydrocannabinol                | 100               | µg/mL | C <sub>21</sub> H <sub>30</sub> O <sub>2</sub> | 314.45   | THC          |    | 315.26(CV38)<br>>193.16<br>(CE24) | 315.26(CV38)<br>>123.07<br>(CE32) | 315.26(CV38)<br>>93.06<br>(CE24)  | 313.19(66CV)<br>>245.12<br>(CE28) | 313.19(66CV)<br>>191.12<br>(CE28) | 313.19(66CV)<br>>179.09<br>(CE24) |
| Cannabidivarin                      | 1000              | µg/mL | C <sub>19</sub> H <sub>26</sub> O <sub>2</sub> | 286.41   | CBDV         |  | 287.10(CV12)<br>>155.03<br>(CE12) | -                                 | -                                 | 285.16(44CV)<br>>151.06<br>(CE18) | 285.16(44CV)<br>>217.12<br>(CE22) | 285.16(44CV)<br>>107.05<br>(CE30) |
| 11-nor-9-Carboxy-THC                | 100               | µg/mL | C <sub>21</sub> H <sub>28</sub> O <sub>4</sub> | 344.445  | THC-COOH     |  | 345.17(CV36)<br>>289.09<br>(CE16) | 345.17(CV36)<br>>313.16<br>(CE8)  | 345.17(CV36)<br>>143.10<br>(CE10) | 343.23(CV14)<br>>283.25<br>(CE10) | 343.23(CV14)<br>>255.14<br>(CE10) | -                                 |
| Cannabinol                          | 1000              | µg/mL | C <sub>21</sub> H <sub>26</sub> O <sub>2</sub> | 310.43   | CBN          |  | 311.23(CV38)<br>>223.10<br>(CE20) | 311.23(CV38)<br>>43.05<br>(CE30)  | 311.23(CV38)<br>>161.08<br>(CE24) | 309.16(CV64)<br>>279.14<br>(CE32) | 309.16(CV64)<br>>222.16<br>(CE44) | 309.16(CV64)<br>>171.08<br>(CE28) |

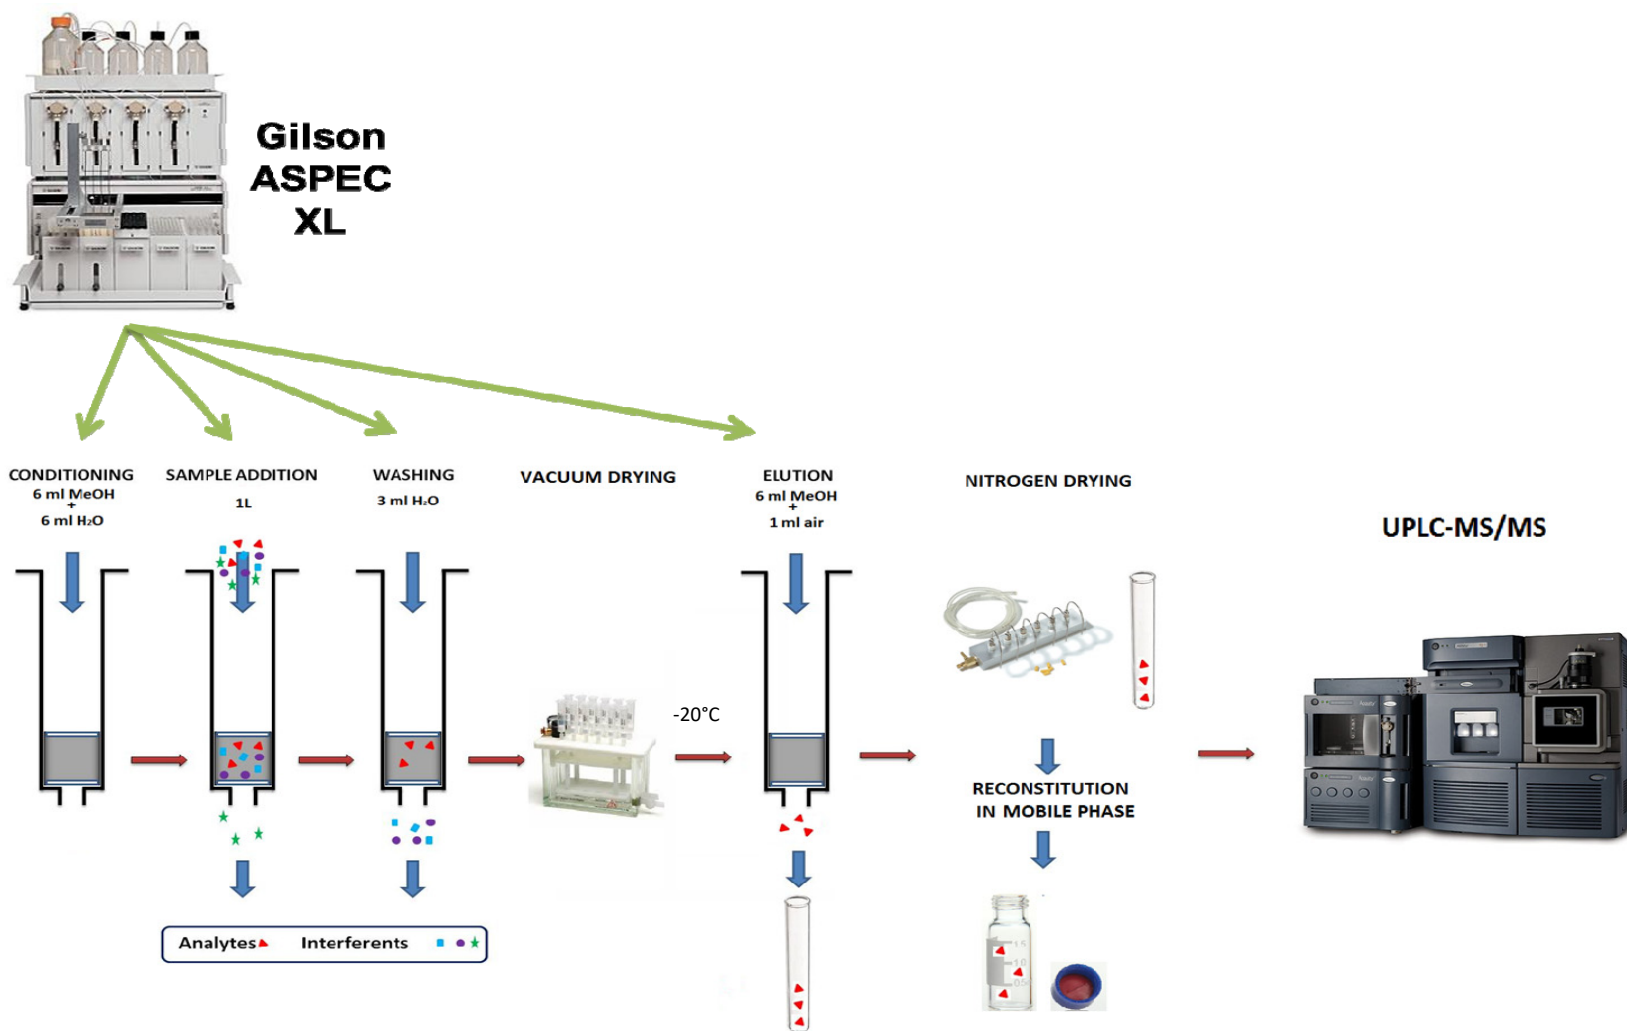

**Figure S4.** Scheme of the offline SPE method developed and applied for the enrichment / pre-concentration on standard solutions for calibration and on environmental water samples for quantification, prior to the UPLC-MS/MS analysis.

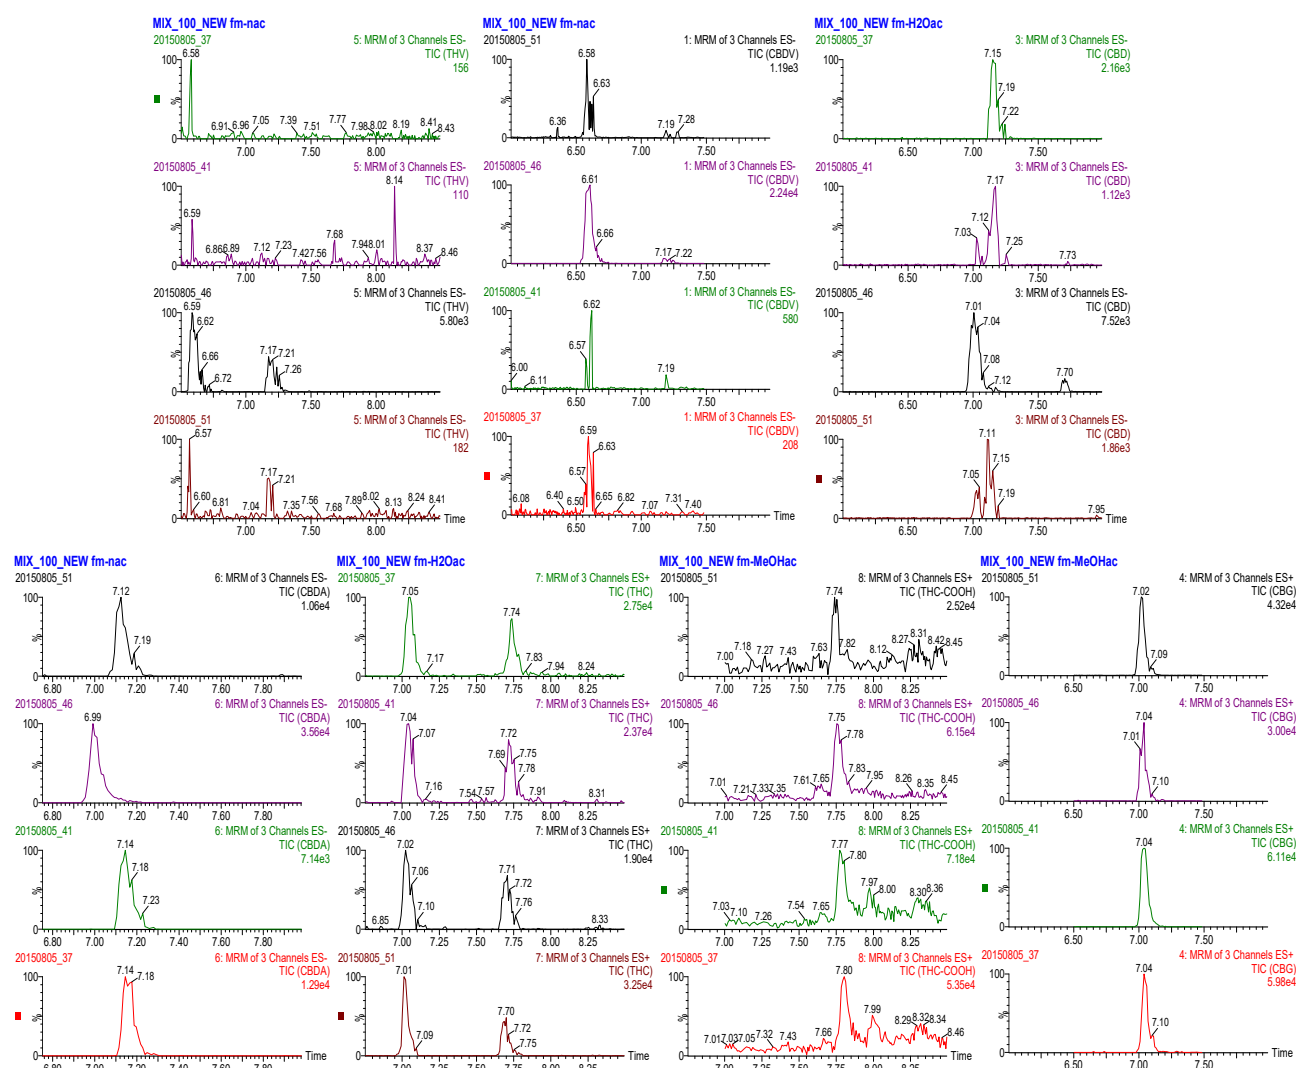

**Figure S5.** Improvement of chromatographic conditions for compounds THV, CBDV, CBD, CBDA, THC, THC-COOH, CBG obtained with the optimized chromatographic mobile phase (grey), compared to other mobile phases (other colors).
